# Supplementary material for: Evolution of Intrinsic Disorder in Protein Loops
Source: MDPI journal article supplement (doi:10.3390/life13102055), 2023-10-14
Supplement: s1 [file s1]

# Evolution of Intrinsic Disorder in Protein Loops

Fizza Mughal <sup>1</sup> and Gustavo Caetano-Anollés <sup>1,2,\*</sup>

**Table S2.** List of ‘ordered’ loop prototypes mapped to SCOP FFs represented by their SCOP concise classification strings (*ccs*).

| Loop prototype | SCOP <i>ccs</i> | Fold family (FF) description                                                         | Age ( <i>nd</i> ) | Molecular function      | Function description                        | Venn group |
|----------------|-----------------|--------------------------------------------------------------------------------------|-------------------|-------------------------|---------------------------------------------|------------|
| DS.HG.2.1.35   | e.18.1.1        | Nickel-iron hydrogenase, large subunit                                               | 0.545             | Metabolism              | Other enzymes                               | AB         |
| DS.HH.8.9.1    | e.18.1.1        | Nickel-iron hydrogenase, large subunit                                               | 0.545             | Metabolism              | Other enzymes                               | AB         |
| DS.BK.5.93.1   | d.41.1.1        | CO dehydrogenase molybdo-protein N-domain-like                                       | 0.356             | Metabolism              | Electron transfer/transport                 | ABE        |
| DS.BK.6.34.1   | d.145.1.2       | Uridine diphospho-N-Acetylenolpyruvylglucosamine reductase (MurB), N-terminal domain | 0.472             | General                 | Small molecule binding                      | ABE        |
| DS.BN.2.90.1   | d.127.1.1       | Creatinase/aminopeptidase                                                            | 0.137             | Intracellular processes | Proteases, peptidases, and their inhibitors | ABE        |
| DS.BN.4.118.1  | b.69.11.1       | Putative isomerase YbhE                                                              | 0.777             | Metabolism              | Other enzymes                               | ABE        |
| DS.EH.2.19.5   | c.1.12.7        | Phosphoenolpyruvate mutase/Isocitrate lyase-like                                     | 0.335             | Metabolism              | Energy production and conversion            | ABE        |
| DS.EH.3.33.1   | c.55.1.13       | CoaX-like                                                                            | 0.3266            | Metabolism              | Other enzymes                               | ABE        |
| DS.EH.4.88.1   | c.36.1.6        | TK-like Pyr module                                                                   | 0.193             | General                 | Small molecule binding                      | ABE        |
| DS.GH.0.1.119  | d.90.1.1        | NADH oxidase/flavin reductase                                                        | 0.184             | Metabolism              | Electron transfer/transport                 | ABE        |
| DS.HE.11.1.1   | a.102.1.3       | N-acylglucosamine (NAG) epimerase                                                    | 0.472             | Metabolism              | Carbohydrate transport and metabolism       | ABE        |
| DS.HE.4.14.5   | c.69.1.21       | PepX catalytic domain-like                                                           | 0.421             | Metabolism              | Other enzymes                               | ABE        |
| DS.HE.5.27.3   | c.1.9.15        | PP1699/LP2961-like                                                                   | 0.356             | Metabolism              | Other enzymes                               | ABE        |
| DS.HH.4.92.1   | f.21.2.1        | Fumarate reductase respiratory complex cytochrome b subunit, FrdC                    | 0.502             | Metabolism              | Other enzymes                               | ABE        |
| DS.HH.8.6.1    | f.44.1.1        | Ammonium transporter                                                                 | 0.270             | Intracellular processes | Transport                                   | ABE        |
| DS.BK.4.16.1   | e.1.1.1         | Serpins                                                                              | 0.880             | Intracellular processes | Proteases, peptidases, and their inhibitors | ABEV       |
| DS.BK.6.65.1   | d.144.1.6       | APH phosphotransferases                                                              | 0.210             | Regulation              | Kinases, phosphatases, and inhibitors       | ABEV       |
| DS.BK.7.1.2    | c.10.2.7        | Ngr ectodomain-like                                                                  | 0.987             | General                 | General or several functions                | ABEV       |
| DS.BN.12.4.1   | c.67.1.1        | AAT-like                                                                             | 0.107             | Metabolism              | Transferases                                | ABEV       |
| DS.BN.8.37.1   | g.37.1.1        | Classic zinc finger, C2H2                                                            | 0.982             | Regulation              | DNA-binding (transcription factors)         | ABEV       |
| DS.EG.2.16.3   | c.66.1.18       | Mycolic acid cyclopropane synthase                                                   | 0.326             | Metabolism              | Transferases                                | ABEV       |
| DS.EG.2.16.4   | c.66.1.49       | BC2162-like                                                                          | 0.446             | Metabolism              | Transferases                                | ABEV       |
| DS.EG.2.82.1   | c.66.1.42       | AD-003 protein-like                                                                  | 0.78969<br>957    | Metabolism              | Transferases                                | ABEV       |

|               |           |                                                           |       |                         |                                                               |      |
|---------------|-----------|-----------------------------------------------------------|-------|-------------------------|---------------------------------------------------------------|------|
| DS.EH.0.1.88  | c.68.1.7  | 1,3-glucuronyltransferase                                 | 0.876 | Metabolism              | Transferases                                                  | ABEV |
| DS.EH.1.27.1  | c.7.1.2   | R1 subunit of ribonucleotide reductase, C-terminal domain | 0.481 | Metabolism              | Other enzymes                                                 | ABEV |
| DS.EH.2.9.10  | c.3.1.6   | Thi4-like                                                 | 0.579 | General                 | Small molecule binding                                        | ABEV |
| DS.EH.3.77.1  | c.53.2.1  | beta-carbonic anhydrase, cab                              | 0.283 | Metabolism              | Other enzymes                                                 | ABEV |
| DS.EH.4.73.1  | c.69.1.1  | Acetylcholinesterase-like                                 | 0.721 | Metabolism              | Other enzymes                                                 | ABEV |
| DS.GE.1.33.2  | b.29.1.15 | Trypanosoma sialidase, C-terminal domain                  | 0.588 | Metabolism              | Secondary metabolites biosynthesis, transport, and catabolism | ABEV |
| DS.HE.2.23.2  | b.50.1.2  | Pepsin-like                                               | 0.841 | Intracellular processes | Proteases, peptidases, and their inhibitors                   | ABEV |
| DS.HE.5.136.1 | d.159.1.3 | Protein serine/threonine phosphatase                      | 0.343 | Intracellular processes | Proteases, peptidases, and their inhibitors                   | ABEV |
| DS.HE.5.158.1 | c.36.1.9  | Pyruvate oxidase and decarboxylase PP module              | 0.253 | General                 | Small molecule binding                                        | ABEV |
| DS.HH.1.3.35  | a.138.1.1 | Cytochrome c3-like                                        | 0.532 | Metabolism              | Oxidation/reduction                                           | ABEV |
| DS.HH.10.9.1  | a.74.1.1  | Cyclin                                                    | 0.983 | Regulation              | DNA-binding (transcription factors)                           | ABEV |
| DS.HH.3.25.1  | a.104.1.1 | Cytochrome P450                                           | 0.974 | Metabolism              | Oxidation/reduction                                           | ABEV |
| DS.HH.4.26.3  | a.211.1.1 | HD domain                                                 | 0.094 | Metabolism              | Other enzymes                                                 | ABEV |
| DS.HH.4.50.1  | a.25.1.2  | Ribonucleotide reductase-like                             | 0.485 | Intracellular processes | Inorganic ion transport and metabolism                        | ABEV |
| DS.HH.4.70.1  | a.211.1.2 | PDEase                                                    | 0.863 | Metabolism              | Other enzymes                                                 | ABEV |
| DS.HH.4.8.4   | a.102.1.2 | Cellulases catalytic domain                               | 0.378 | Metabolism              | Carbohydrate transport and metabolism                         | ABEV |
| DS.GE.3.21.2  | g.35.1.1  | HIPIP (high-potential iron protein)                       | 0.485 | Metabolism              | Electron transfer/transport                                   | ABV  |
| DS.EG.2.16.6  | c.66.1.19 | Histamine methyltransferase                               | 0.588 | Metabolism              | Transferases                                                  | BE   |
| DS.HH.5.10.3  | a.123.1.1 | Nuclear receptor ligand-binding domain                    | 0.880 | Regulation              | Signal transduction                                           | BE   |
| DS.BK.3.56.2  | b.22.1.1  | TNF-like                                                  | 0.858 | Extracellular processes | Immune response                                               | BEV  |
| DS.EG.1.6.14  | a.119.1.2 | Animal lipoxygenases                                      | 0.678 | Metabolism              | Coenzyme metabolism                                           | BEV  |
| DS.EH.1.5.32  | c.141.1.1 | Glycerate kinase I                                        | 0.348 | Metabolism              | Other enzymes                                                 | BEV  |
| DS.HH.9.11.1  | d.42.1.1  | BTB/POZ domain                                            | 0.970 | General                 | Protein-protein interaction (dimerization domains)            | BEV  |
| DS.BK.4.96.1  | b.2.5.7   | DNA-binding domain from NDT80                             | 0.704 | Regulation              | DNA-binding (transcription factors)                           | E    |
| DS.HH.5.17.3  | a.7.5.1   | Tubulin chaperone cofactor A                              | 0.678 | Intracellular processes | Posttranslational modification, protein turnover, chaperones  | E    |
